# Supplementary material
Source: Springer Nature journal article supplement (https://www.springermedizin.de/resource/supplementary/12889_2014_7061_MOESM2_ESM.pdf/9499712)

■ Has received HPV vaccine

■ Considering to be vaccinated

■ Require more information before decision

■ Will not consider/has never considered

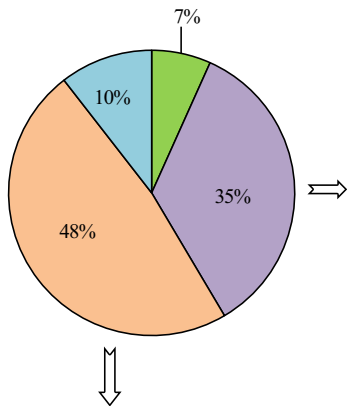

### Reasons for considering to be vaccinated

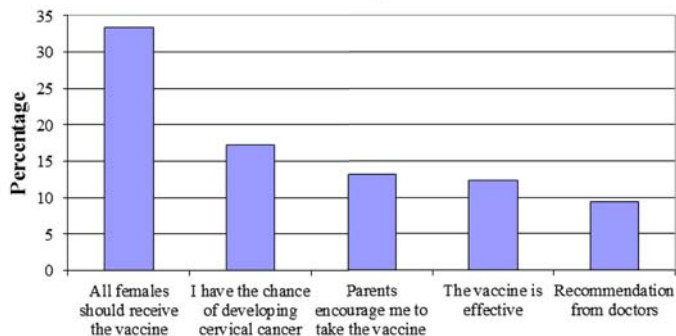

### Reasons for not considering to be vaccinated

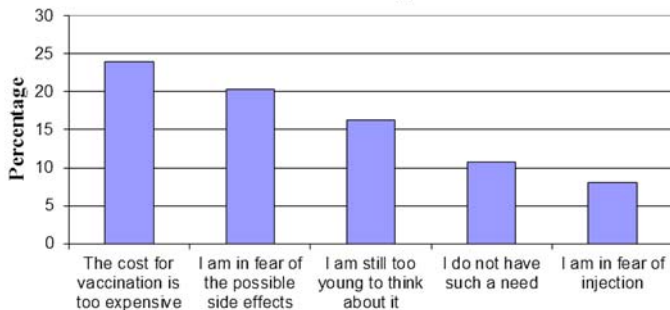

Supplement: MOESM2 [file 9499712]
